# Supplementary material for: Withania somnifera-derived carbon dots protect human epidermal cells against UVB-induced cell death and support growth factor-mediated wound healing
Source: Royal Society of Chemistry journal article supplement (doi:10.1039/d2na00545j), 2022-12-09
Supplement: d2na00545j1.pdf [file d2na00545j1.pdf]

## Supplementary Information

### ***Withania somnifera*-derived Carbon Dots Protect Human Epidermal Cells Against UVB-Induced Cell Death and Support Growth Factor-Mediated Wound Healing**

Acharya Balkrishna<sup>a,b,c</sup>, Meenu Tomar<sup>a</sup>, Kunal Bhattacharya<sup>\*\*</sup>, Anurag Varshney<sup>a,b,d\*</sup>

*a. Drug Discovery and Development Division, Patanjali Research Institute, Haridwar, India*

*b. Department of Allied and Applied Sciences, University of Patanjali, Haridwar, India*

*c. Patanjali Yog Peeth (UK) Trust, 40 Lambhill Street, Kinning Park, United Kingdom*

*d. Special Centre for Systems Medicine, Jawahar Lal Nehru University, New Delhi, India*

*Corresponding authors:*

[\\*anurag@patanjali.res.in](mailto:*anurag@patanjali.res.in); [anurag@prft.co.in](mailto:anurag@prft.co.in)

[\\*\\*kunalbhattacharya@patanjali.res.in](mailto:**kunalbhattacharya@patanjali.res.in); [kunalbhattacharya@prft.co.in](mailto:kunalbhattacharya@prft.co.in)

A)

*W. somnifera* extract

B)

*W. somnifera* CDs

A)

pH 2.0

B)

pH 7.0

C)

pH 10.0
